# Supplementary material for: Dual-potential electrochemiluminescence from black phosphorus and graphitic carbon nitrides for label-free enzymatic biosensing
Source: Royal Society of Chemistry journal article supplement (doi:10.1039/d1an01366a), 2021-01-01
Supplement: d1an01366a1.pdf [file d1an01366a1.pdf]

## Supporting Information

# Dual-potential Electrochemiluminescence from Black Phosphorus and Graphitic Carbon Nitrides for Label-Free Enzymatic Biosensing

Hao Yin, Ming Lei, Hui Liu, YongPing Dong\*

*School of Chemistry and Chemical Engineering, Anhui University of Technology,  
Maanshan 243002, China*

## **1. Experimental Section**

### **1.1 Apparatus**

For characterization of nanomaterials, transmission electron microscopy (TEM) was obtained on a JEOL-2100 transmission electron microscopy (JEOL, Japan). FL and UV-vis absorption spectra were recorded at Shimadzu UV-3600 spectrophotometer and RF-5301PC FL spectrophotometer, respectively. The reference electrode (SCE), the counter electrode (platinum wire), and the working electrode (the modified glassy carbon electrode (GCE,  $\Phi = 3$  mm)) made up the classical three-electrode system that was applied in the detection. The ECL monitoring and electrochemical characterization were performed on MPI-B ECL analyzer (Xi'an Remax Electronic science & Technology Co. Ltd., China) and CHI 760D electrochemical workstation (Shanghai Chenhua Instrument, China), respectively.

### **1.2 Preparation of BPNSs**

The preparation of black phosphorus nanosheets is in accordance with the previous literature (Ding et al., 2019).<sup>1</sup> 5 mg of BP powder was added into 1 mL of double-distilled water in a mortar and then ground for 20 min. The mixture was transferred to a glass vial containing 3 mL of double-distilled water. After being sealed carefully, the vial was sonicated in an ice-bath for 8 h at a power of 100 W. The resulting dispersion was centrifuged at 11000 rpm for 20 minutes. The top 75% of the solution was collected as the sample of BPNSs.

### 1.3 Preparation of g-C<sub>3</sub>N<sub>4</sub> nanosheet

The bulk g-C<sub>3</sub>N<sub>4</sub> and the g-C<sub>3</sub>N<sub>4</sub> nanosheets were prepared by direct pyrolysis of the mixture of thiourea and urea in a tube furnace according to previous work with some necessary revision (Niu et al., 2012).<sup>2</sup> In a typical process, 3 g thiourea and 3 g urea were mixed together in 20 mL deionized water, and ultrasonic treated for 5 min. Then, the mixture was put into the muffle furnace and calcined at 550 °C for 2 h with a heating rate of 5 °C min<sup>-1</sup> for both of the heating and the cooling processes. The obtained yellow powder was the bulk g-C<sub>3</sub>N<sub>4</sub>, which was ground to powder for further use. In the next process, the bulk g-C<sub>3</sub>N<sub>4</sub> powder was placed in an open ceramic container and heated at 500 °C for 2 h with a heating rate of 5 °C min<sup>-1</sup> for both of the heating and the cooling processes. The light yellow powder of g-C<sub>3</sub>N<sub>4</sub> nanosheets were finally obtained.

## 2. Results and discussions

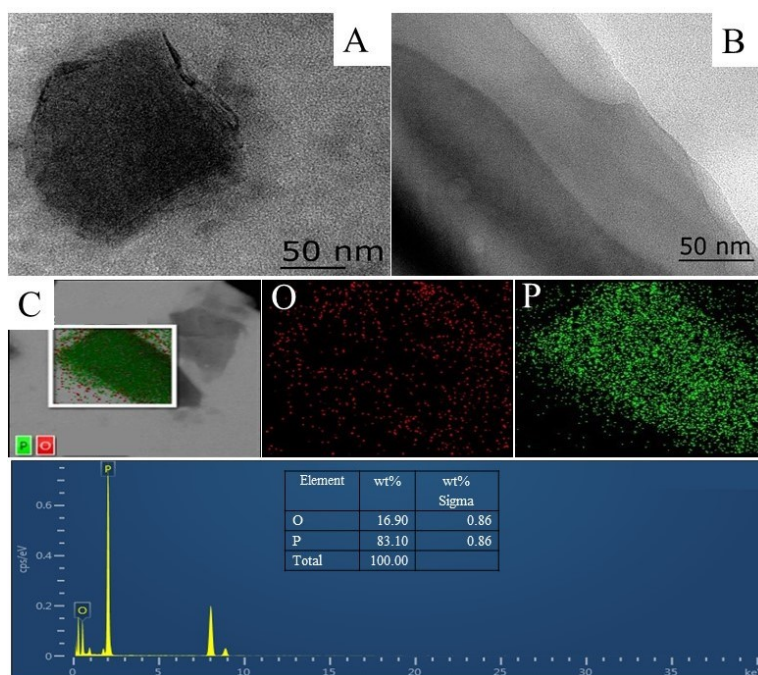

**Fig.S1** (A, B) TEM images of BPNSs. (C) EDS and corresponding mapping analyses of BPNSs

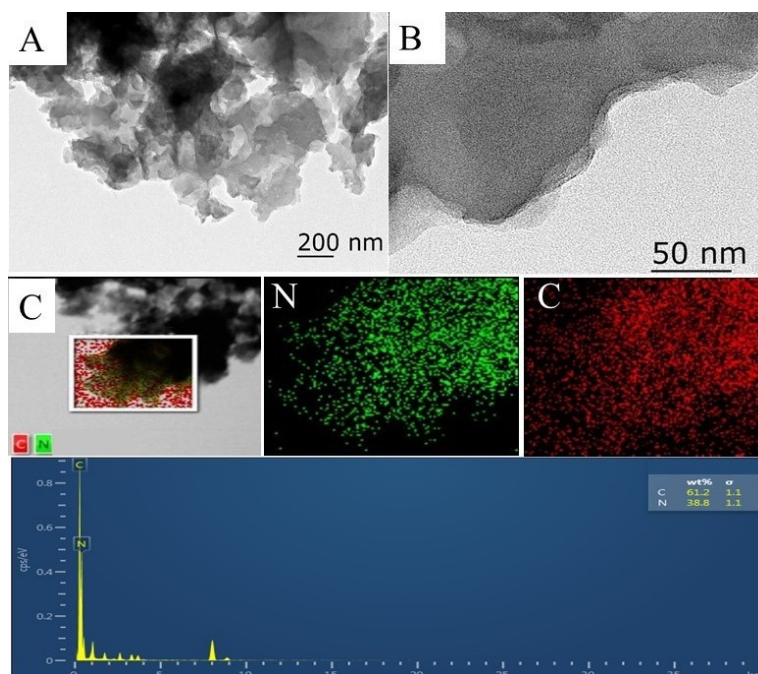

**Fig.S2** (A, B) TEM images of g-C<sub>3</sub>N<sub>4</sub>. (C) EDS and corresponding mapping analyses of g-C<sub>3</sub>N<sub>4</sub>.

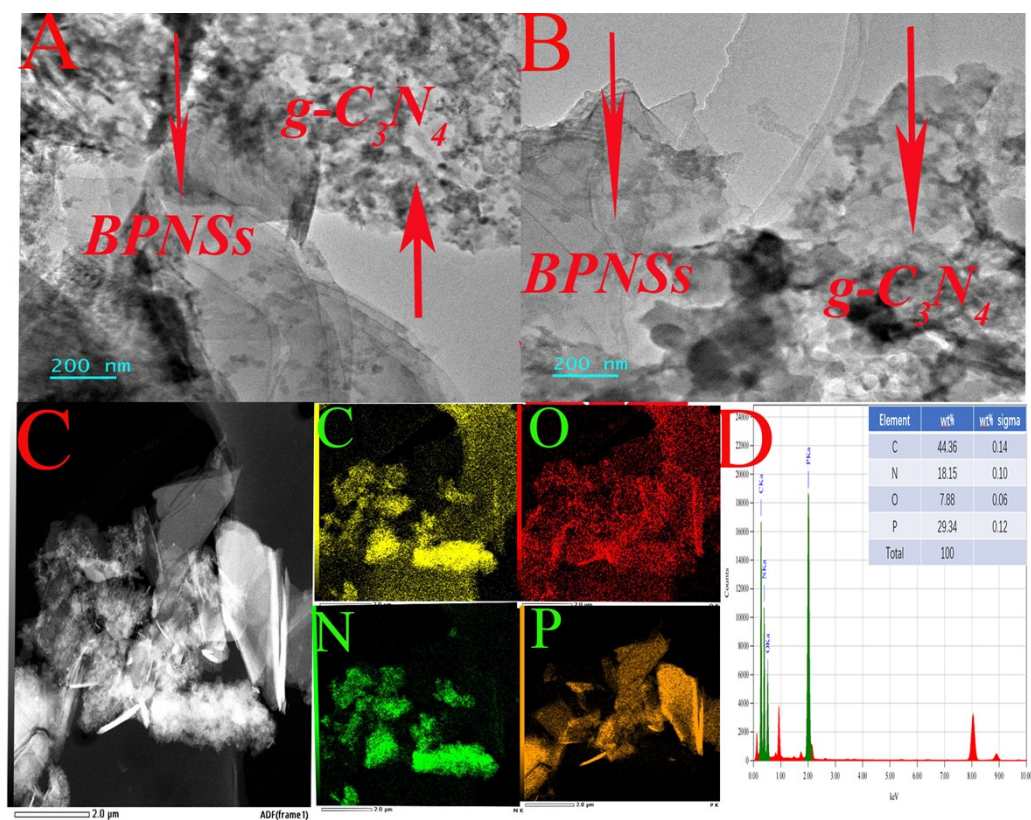

**Fig.S3**(A, B) TEM images of g-C<sub>3</sub>N<sub>4</sub>/BPNSs. (C, D) EDS and corresponding mapping analyses of g-C<sub>3</sub>N<sub>4</sub>/BPNS.

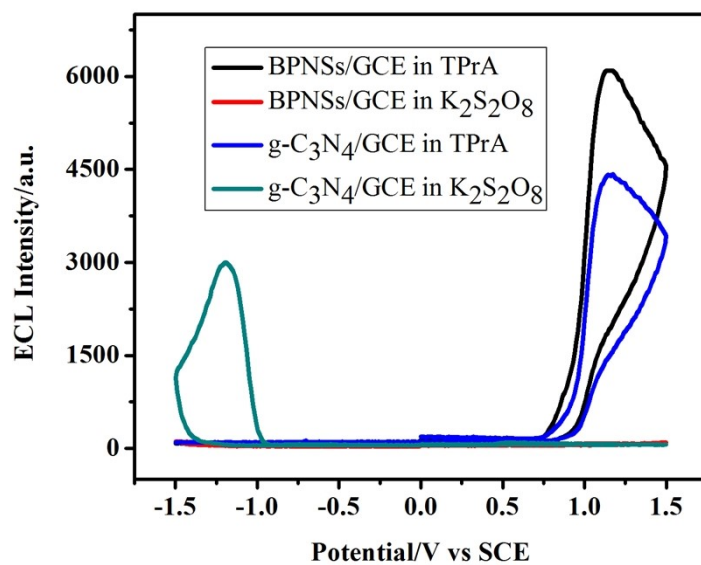

**Fig.S4** ECL curves of a BPNSs/GCE and a g-C<sub>3</sub>N<sub>4</sub>/GCE in PBS with 0.1 mM K<sub>2</sub>S<sub>2</sub>O<sub>8</sub> or 1 mM TPrA; scan rate, 100 mV s<sup>-1</sup>.

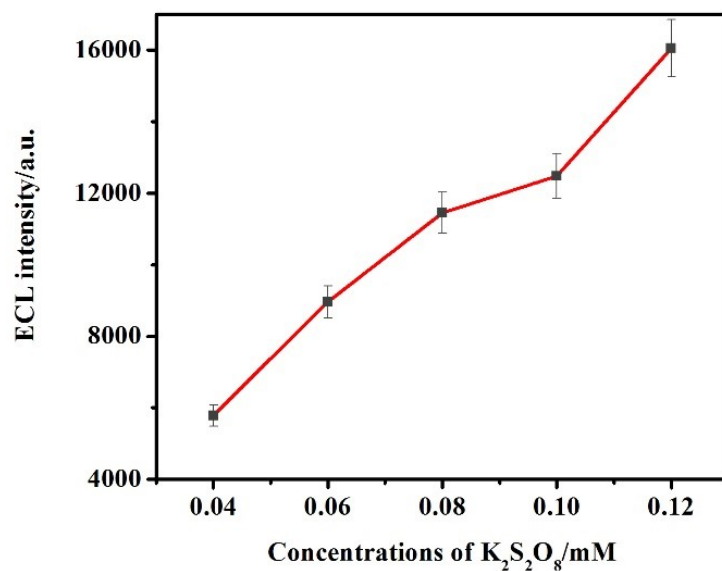

**Fig.S5** Effect of the concentration of K<sub>2</sub>S<sub>2</sub>O<sub>8</sub> on cathodic-ECL intensity.

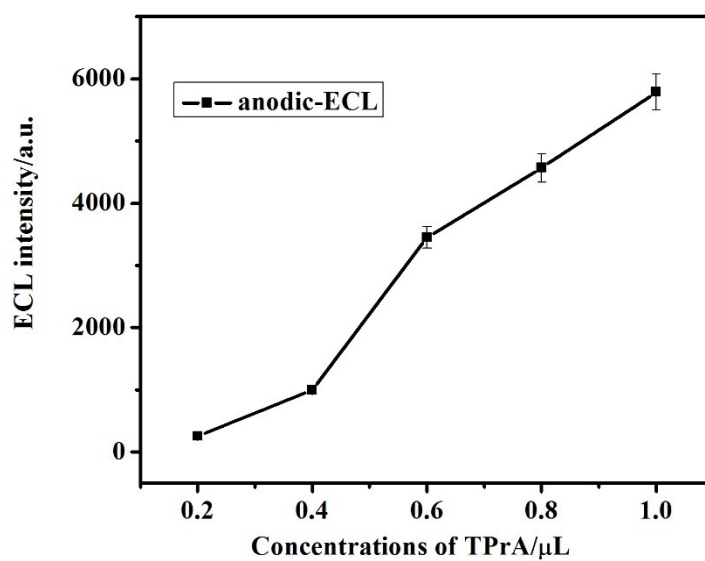

**Fig.S6** Effect of the concentration of TPrA on cathodic-ECL intensity.

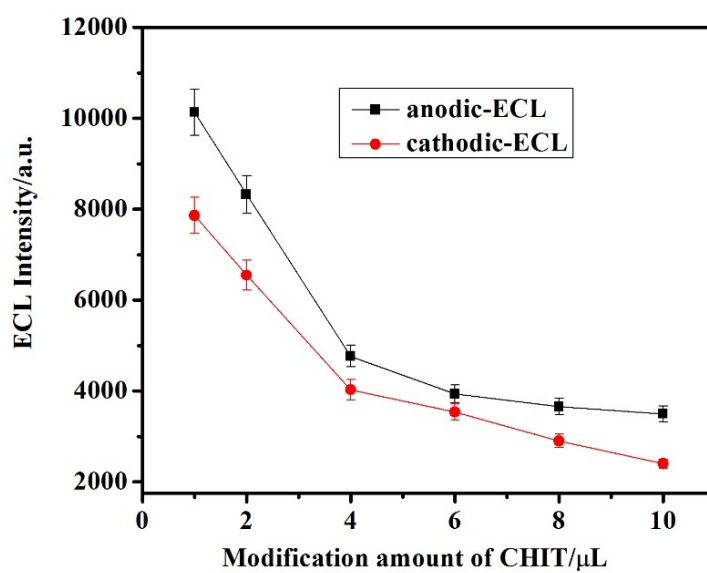

**Fig.S7** Effect of the modification amount of CS on ECL intensity.

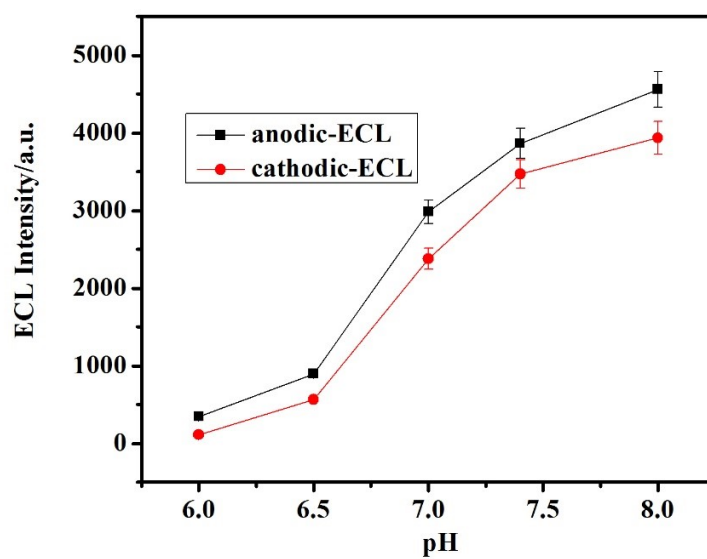

**Fig.S8** Effect of the pH value on ECL intensity.

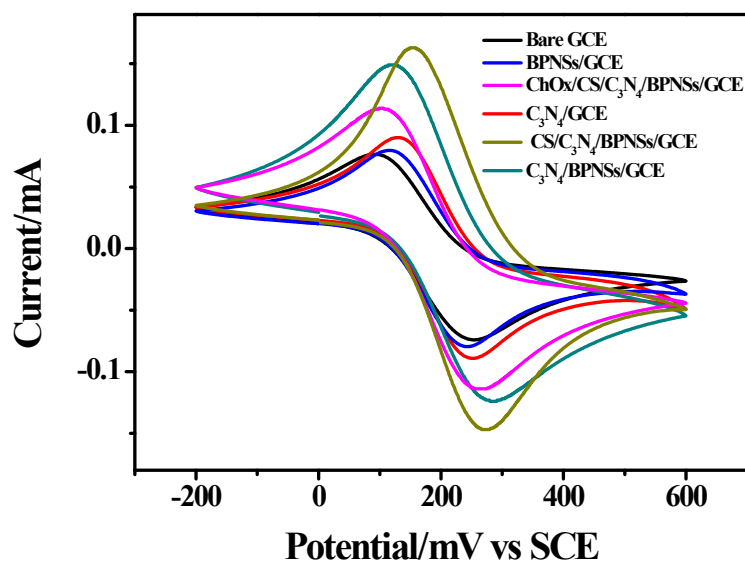

**Fig.S9** CV curves of different stages of modified electrodes in 1 mM  $K_3Fe(CN)_6$



**Table S1.** Comparison of different methods for determination of cholesterol.

| Methods     | Linear range/<br>mM | Detection limit/ $\mu$ M | Reference  |
|-------------|---------------------|--------------------------|------------|
| colorimetry | 0.1-1.5             | 40                       | 3          |
| DPV         | 0.01-5.0            | 4.3                      | 4          |
| Amperometry | 0.0022-0.52         | 0.75                     | 5          |
| DPV         | 0.0001-9.331        | 0.021                    | 6          |
| ECL         | 0.0005 - 0.5        | 0.14                     | This paper |

### References

- 1 H. Ding, Z. Tang, L. Zhang, Y. Dong, *Analyst*, 2019, **144**, 1326–1333.
- 2 P. Niu, L. Zhang, G. Liu, H. Cheng, *Adv. Funct. Mater.*, 2012, **22**, 4763–4770.
- 3 H.V. Tran, T.V. Nguyen, L.T.N. Nguyen, H.S. Hoang and C. D. Huynh, *J. Sci. Adv. Mater. Devices*, 2020, **5**, 385–391.
- 4 L. Zhu, L. Xu, L. Tan, H. Tan, S. Yang and S. Yao, *Talanta*, 2013, **106**, 192–199.
- 5 S. Cao, L. Zhang, Y. Chai and R. Yuan, *Talanta*, 2013, **109**, 167–172.
- 6 S. Wu, J. Hao, S. Yang, Y. Sun, Y. Wang, W. Zhang, H. Mao and X. Song, *Sens. Actuat. B*, 2019, **298**, 126856.
